# Supplementary material for: The Cancer-Associated Genetic Variant Rs3903072 Modulates Immune Cells in the Tumor Microenvironment
Source: Front Genet. 2019 Aug 23;10:754. doi: 10.3389/fgene.2019.00754 (PMC6715770; doi:10.3389/fgene.2019.00754)
Supplement: Supplementary file 3 [file Table_2.xlsx]

## Sheet: ENCFF777YSR
Supplementary Table 6. GREAT analysis results showing various ontology associated terms for cis-regulatory activities of TEAD2
Ontology	Term Name	Binom Rank	Binom Raw P-Value	Binom FDR Q-Val	Binom Fold Enrichment	Binom Observed Region Hits	Binom Region Set Coverage	Hyper Rank	Hyper FDR Q-Val	Hyper Fold Enrichment	Hyper Observed Gene Hits	Hyper Total Genes	Hyper Gene Set Coverage
GO Biological Process	regulation of interferon-gamma-mediated signaling pathway	19	3.99714e-08	2.19632e-05	5.78226	16	0.0109589	35	0.00132164	4.27512	12	24	0.0056872
GO Biological Process	regulation of response to interferon-gamma	20	4.08749e-08	2.13367e-05	5.77266	16	0.0109589	46	0.00172792	4.10411	12	25	0.0056872
GO Biological Process	cellular response to interferon-gamma	122	3.6027e-05	0.00308297	2.47681	26	0.0178082	148	0.0263931	2.18969	21	82	0.00995261
GO Biological Process	erythrocyte differentiation	149	5.94249e-05	0.00416373	2.45061	25	0.0171233	170	0.0383868	2.2633	18	68	0.00853081
GO Biological Process	positive regulation of protein complex assembly	150	6.24764e-05	0.00434835	2.13596	33	0.0226027	134	0.0178668	2.09565	25	102	0.0118483
GO Biological Process	cellular response to oxygen levels	165	8.335e-05	0.00527378	2.22857	29	0.019863	65	0.00304188	2.36496	26	94	0.0123223
GO Biological Process	interferon-gamma-mediated signaling pathway	169	9.69095e-05	0.0059866	2.76754	19	0.0130137	159	0.0301538	2.38285	17	61	0.00805687
GO Biological Process	erythrocyte homeostasis	171	0.000102491	0.00625735	2.31903	26	0.0178082	180	0.046729	2.16606	19	75	0.00900474
GO Biological Process	regulation of cytokine-mediated signaling pathway	200	0.000192343	0.0100403	2.18731	27	0.0184931	117	0.0129236	2.23472	23	88	0.0109005
GO Biological Process	membrane to membrane docking	223	0.000272066	0.0127371	6.95901	6	0.00410959	185	0.0477427	6.84019	4	5	0.00189573
GO Biological Process	cellular response to hypoxia	228	0.000286455	0.0131166	2.20664	25	0.0171233	106	0.0097687	2.28669	23	86	0.0109005
GO Biological Process	cellular response to decreased oxygen levels	238	0.00037483	0.0164421	2.16577	25	0.0171233	110	0.0113983	2.26041	23	87	0.0109005
GO Biological Process	regulation of response to cytokine stimulus	256	0.000513459	0.0209395	2.04989	27	0.0184931	153	0.0280969	2.09208	23	94	0.0109005
GO Biological Process	production of molecular mediator of immune response	302	0.00122365	0.0423012	2.36552	17	0.0116438	175	0.0411902	2.54688	14	47	0.00663507
Mouse Phenotype	abnormal hematopoietic system physiology	15	1.17726e-11	6.21436e-09	2.00814	110	0.0753425	34	1.21676e-06	1.87796	85	387	0.0402844
Mouse Phenotype	abnormal megakaryocyte progenitor cell morphology	17	1.48033e-11	6.89485e-09	2.24414	85	0.0582192	90	0.000247386	1.82777	59	276	0.0279621
Mouse Phenotype	decreased inflammatory response	25	9.72436e-11	3.0799e-08	2.42653	67	0.0458904	133	0.00125597	1.78559	52	249	0.0246446
Mouse Phenotype	abnormal megakaryocyte morphology	30	4.95871e-10	1.30877e-07	2.1539	79	0.0541096	118	0.000682644	1.78662	56	268	0.0265403
Mouse Phenotype	abnormal blood coagulation	31	8.13252e-10	2.0772e-07	2.14202	78	0.0534247	111	0.000545641	1.82495	54	253	0.0255924
Mouse Phenotype	abnormal hemostasis	32	9.37816e-10	2.32051e-07	2.135	78	0.0534247	116	0.000663679	1.81064	54	255	0.0255924
Mouse Phenotype	abnormal platelet physiology	34	1.58337e-09	3.6874e-07	2.89864	43	0.0294521	189	0.00739923	2.06122	27	112	0.0127962
Mouse Phenotype	abnormal platelet morphology	43	8.87935e-09	1.63504e-06	2.12067	70	0.0479452	164	0.00297308	1.76142	48	233	0.0227488
Mouse Phenotype	abnormal thrombopoiesis	44	1.26976e-08	2.28499e-06	2.10107	70	0.0479452	175	0.00432348	1.73169	48	237	0.0227488
Mouse Phenotype	abnormal platelet cell number	45	2.61222e-08	4.59635e-06	2.20787	60	0.0410959	146	0.00169642	1.87582	43	196	0.0203791
Mouse Phenotype	abnormal iron level	47	3.51719e-08	5.92535e-06	3.35605	29	0.019863	132	0.0012231	2.40175	25	89	0.0118483
Mouse Phenotype	abnormal iron homeostasis	51	6.54184e-08	1.01565e-05	3.17922	30	0.0205479	128	0.000952282	2.39039	26	93	0.0123223
Mouse Phenotype	increased neutrophil cell number	54	1.17662e-07	1.72527e-05	2.19536	55	0.0376712	69	7.37227e-05	2.16271	43	170	0.0203791
Mouse Phenotype	decreased susceptibility to endotoxin shock	63	3.14142e-07	3.94822e-05	3.25255	26	0.0178082	156	0.00239803	2.44292	22	77	0.0104265
Mouse Phenotype	abnormal splenic cell ratio	65	3.42816e-07	4.17602e-05	3.23722	26	0.0178082	178	0.00514619	2.6428	17	55	0.00805687
Mouse Phenotype	abnormal circulating interleukin-1 beta level	67	5.55205e-07	6.56136e-05	4.7356	16	0.0109589	210	0.012277	2.72053	14	44	0.00663507
Mouse Phenotype	decreased susceptibility to autoimmune disorder	68	6.0615e-07	7.05808e-05	2.25574	46	0.0315069	141	0.00158934	1.91563	41	183	0.0194313
Mouse Phenotype	increased circulating interleukin-1 beta level	77	1.84122e-06	0.000189335	5.80765	12	0.00821918	220	0.0152081	3.28855	10	26	0.00473934
Mouse Phenotype	decreased platelet cell number	81	2.13203e-06	0.000208412	2.19384	44	0.030137	242	0.0222119	1.81546	31	146	0.0146919
Mouse Phenotype	retinal neovascularization	88	3.05542e-06	0.000274919	3.44142	20	0.0136986	86	0.00018901	3.6001	16	38	0.00758294
PANTHER Pathway	VEGF signaling pathway	3	1.7611e-06	8.92289e-05	2.82074	28	0.0191781	5	0.00906206	2.46363	17	59	0.00805687
PANTHER Pathway	T cell activation	4	8.61713e-06	0.000327451	2.40567	32	0.0219178	4	0.00815941	2.27285	21	79	0.00995261
PANTHER Pathway	Hypoxia response via HIF activation	9	0.000397856	0.00671935	2.72107	16	0.0109589	6	0.0107047	3.28855	10	26	0.00473934
PANTHER Pathway	Axon guidance mediated by netrin	17	0.00513959	0.045954	2.10271	16	0.0109589	8	0.0292861	2.85008	10	30	0.00473934
MSigDB Pathway	Pancreatic cancer	5	1.11349e-07	2.93961e-05	2.90897	33	0.0226027	13	0.0390512	2.28809	19	71	0.00900474
MSigDB Pathway	Thrombin signaling and protease-activated receptors	7	5.38417e-07	0.00010153	3.24801	25	0.0171233	3	0.0167849	3.23522	14	37	0.00663507
MSigDB Pathway	T cell receptor signaling pathway	8	1.10058e-06	0.000181596	2.39059	39	0.0267123	16	0.0478937	1.97922	25	108	0.0118483
MSigDB Pathway	TRAIL signaling pathway	14	3.99992e-06	0.000377135	4.29351	15	0.010274	9	0.0370026	3.24319	11	29	0.00521327
MSigDB Pathway	IFN-gamma pathway	19	5.96396e-06	0.000414338	3.17304	21	0.0143836	7	0.0264027	2.91959	14	41	0.00663507
MSigDB Pathway	Coregulation of Androgen receptor activity	21	7.69344e-06	0.000483587	2.50437	30	0.0205479	18	0.0506238	2.30721	17	63	0.00805687
MSigDB Pathway	Genes involved in Regulation of IFNG signaling	23	1.05367e-05	0.000604713	5.34471	11	0.00753425	2	0.017037	5.26168	8	13	0.00379147
MSigDB Pathway	Leukocyte transendothelial migration	25	1.31748e-05	0.000695631	2.16829	38	0.0260274	4	0.0142632	2.15615	29	115	0.0137441
MSigDB Pathway	Jak-STAT signaling pathway	26	1.43531e-05	0.000728697	2.0474	43	0.0294521	15	0.0493719	1.79718	33	157	0.0156398
MSigDB Pathway	Type II diabetes mellitus	30	1.79993e-05	0.00079197	2.70676	24	0.0164384	8	0.0415022	2.67195	15	48	0.007109
MSigDB Pathway	Signaling events mediated by VEGFR1 and VEGFR2	42	7.07235e-05	0.00222274	2.42315	25	0.0171233	20	0.0498046	2.2305	18	69	0.00853081
MSigDB Pathway	Signaling events mediated by focal adhesion kinase	48	0.000125225	0.00344369	2.28923	26	0.0178082	10	0.0393484	2.46363	17	59	0.00805687
MSigDB Pathway	JNK signaling in the CD4+ TCR pathway	51	0.000140607	0.00363924	3.70554	12	0.00821918	5	0.0142656	4.88585	8	14	0.00379147
MSigDB Pathway	PKC-catalyzed phosphorylation of inhibitory phosphoprotein of myosin phosphatase	63	0.000306266	0.006417	2.90474	15	0.010274	6	0.0231795	3.30977	12	31	0.0056872
MSigDB Pathway	Insulin Pathway	87	0.000853313	0.0129468	2.31189	19	0.0130137	14	0.0398183	2.66007	14	45	0.00663507
MSigDB Pathway	IL6-mediated signaling events	118	0.00185737	0.0207774	2.15702	19	0.0130137	19	0.047968	2.54688	14	47	0.00663507
MSigDB Pathway	O-Glycan biosynthesis	163	0.00425579	0.0344641	2.08982	17	0.0116438	1	0.0169622	3.7051	13	30	0.00616114
MSigDB Pathway	Genes involved in Interleukin-6 signaling	167	0.0045895	0.0362763	3.97046	6	0.00410959	11	0.0421159	5.13014	6	10	0.0028436
MSigDB Pathway	Nephrin/Neph1 signaling in the kidney podocyte	169	0.00468574	0.0365987	2.3434	13	0.00890411	17	0.0523999	2.93914	11	32	0.00521327

## Sheet: ENCFF828PUB
Ontology	Term Name	Binom Rank	Binom Raw P-Value	Binom FDR Q-Val	Binom Fold Enrichment	Binom Observed Region Hits	Binom Region Set Coverage	Hyper Rank	Hyper FDR Q-Val	Hyper Fold Enrichment	Hyper Observed Gene Hits	Hyper Total Genes	Hyper Gene Set Coverage
GO Biological Process	positive regulation of protein complex assembly	14	2.70538e-07	0.000201744	2.9593	30	0.0313152	26	0.0313296	2.48783	21	102	0.0140656
GO Biological Process	regulation of protein complex assembly	17	6.33762e-07	0.000389204	2.2189	47	0.0490605	42	0.0371734	1.95472	33	204	0.0221031
GO Biological Process	myeloid cell differentiation	50	1.72602e-05	0.00360393	2.15921	37	0.0386221	30	0.0363375	2.09837	29	167	0.019424
GO Biological Process	regulation of actin filament polymerization	127	0.000346928	0.0285191	2.30854	22	0.0229645	39	0.0370396	2.52298	19	91	0.012726
GO Cellular Component	platelet dense tubular network	29	0.000215689	0.0094085	7.26575	6	0.00626305	5	0.0258172	6.59112	6	11	0.00401875
GO Cellular Component	platelet dense tubular network membrane	41	0.00104755	0.0323207	6.67998	5	0.00521921	10	0.046286	6.71318	5	9	0.00334896
Mouse Phenotype	abnormal platelet physiology	9	1.16573e-07	0.000102558	3.08202	30	0.0313152	152	0.0424349	2.15781	20	112	0.0133959
Mouse Phenotype	abnormal megakaryocyte progenitor cell morphology	14	4.06057e-07	0.000229654	2.13253	53	0.0553236	95	0.0148019	1.79505	41	276	0.0274615
Mouse Phenotype	impaired neutrophil chemotaxis	18	7.82644e-07	0.000344276	4.12061	18	0.0187891	81	0.00896643	3.13282	14	54	0.00937709
Mouse Phenotype	abnormal iron level	24	2.05301e-06	0.000677322	3.52735	20	0.0208768	158	0.0450343	2.30813	17	89	0.0113865
Mouse Phenotype	abnormal platelet morphology	34	5.79551e-06	0.00134967	2.07767	45	0.0469729	124	0.0264143	1.81515	35	233	0.0234427
Mouse Phenotype	abnormal thrombopoiesis	36	7.28328e-06	0.00160192	2.05846	45	0.0469729	135	0.0334083	1.78452	35	237	0.0234427
Mouse Phenotype	decreased susceptibility to induced colitis	37	7.31595e-06	0.00156561	6.2084	10	0.0104384	85	0.00996889	4.35014	9	25	0.00602813
Mouse Phenotype	increased neutrophil cell number	49	1.66959e-05	0.00269791	2.18994	36	0.0375783	115	0.0233527	1.99026	28	170	0.0187542
Mouse Phenotype	abnormal platelet cell number	60	3.92769e-05	0.00518324	2.07497	37	0.0386221	148	0.0404674	1.84955	30	196	0.0200938
Mouse Phenotype	intestinal inflammation	64	4.79153e-05	0.00592802	2.22325	31	0.0323591	108	0.0186472	1.97017	30	184	0.0200938
Mouse Phenotype	retinal neovascularization	78	0.000167181	0.016971	3.40909	13	0.0135699	96	0.0146679	3.49792	11	38	0.00736772
Mouse Phenotype	small intestinal inflammation	81	0.000181362	0.0177287	3.8669	11	0.0114822	122	0.025439	3.45249	10	35	0.00669792
Mouse Phenotype	anisopoikilocytosis	90	0.000298356	0.0262487	4.88423	8	0.00835073	149	0.041174	4.2293	7	20	0.00468855
Mouse Phenotype	spleen hypoplasia	98	0.000415713	0.0335879	2.01346	29	0.0302714	151	0.0411531	2.07689	22	128	0.0147354
PANTHER Pathway	T cell activation	2	3.83918e-05	0.00291778	2.63513	23	0.0240084	2	0.00475226	2.75325	18	79	0.0120563
PANTHER Pathway	Endothelin signaling pathway	9	0.00211766	0.0357649	2.03827	21	0.0219207	1	0.00305954	2.97955	18	73	0.0120563
MSigDB Pathway	mTOR signaling pathway	4	1.47378e-06	0.000486347	3.76098	19	0.019833	17	0.0229196	2.96393	13	53	0.0087073
MSigDB Pathway	T cell receptor signaling pathway	5	2.36986e-06	0.000625643	2.7091	29	0.0302714	7	0.0118822	2.4615	22	108	0.0147354
MSigDB Pathway	Coregulation of Androgen receptor activity	6	2.43847e-06	0.000536463	3.05334	24	0.0250522	3	0.0170931	3.06888	16	63	0.0107167
MSigDB Pathway	Fc epsilon RI signaling pathway	7	1.13106e-05	0.00213285	3.03082	21	0.0219207	14	0.0196566	2.6003	17	79	0.0113865
MSigDB Pathway	Fc Epsilon Receptor I Signaling in Mast Cells	8	1.15295e-05	0.00190237	3.53092	17	0.0177453	2	0.0230776	3.81591	12	38	0.00803751
MSigDB Pathway	FAS signaling pathway ( CD95 )	10	2.46564e-05	0.00325465	4.13803	13	0.0135699	10	0.01241	4.02791	10	30	0.00669792
MSigDB Pathway	Insulin signaling pathway	11	2.5741e-05	0.00308892	2.33822	30	0.0313152	19	0.0269767	2.10152	24	138	0.016075
MSigDB Pathway	TRAIL signaling pathway	12	2.76134e-05	0.00303747	4.79845	11	0.0114822	9	0.00992488	4.1668	10	29	0.00669792
MSigDB Pathway	Type II diabetes mellitus	13	3.59375e-05	0.00364904	3.09384	18	0.0187891	12	0.0109906	3.27268	13	48	0.0087073
MSigDB Pathway	JNK signaling in the CD4+ TCR pathway	15	7.40346e-05	0.00651504	4.70606	10	0.0104384	6	0.0117576	6.04186	7	14	0.00468855
MSigDB Pathway	Regulation of cytoplasmic and nuclear SMAD2/3 signaling	18	8.50823e-05	0.00623937	5.15718	9	0.00939457	15	0.0213412	4.97565	7	17	0.00468855
MSigDB Pathway	Pancreatic cancer	19	9.26833e-05	0.00643905	2.68684	20	0.0208768	21	0.0373233	2.5529	15	71	0.0100469
MSigDB Pathway	Nephrin/Neph1 signaling in the kidney podocyte	21	0.000106736	0.00670913	3.57137	13	0.0135699	1	0.00614411	4.5314	12	32	0.00803751
MSigDB Pathway	Links between Pyk2 and Map Kinases	22	0.000118593	0.00711559	4.06431	11	0.0114822	16	0.0237767	3.88405	9	28	0.00602813
MSigDB Pathway	Phosphatidylinositol signaling system	23	0.000121728	0.00698612	2.55904	21	0.0219207	4	0.0143677	2.82477	18	77	0.0120563
MSigDB Pathway	Insulin Pathway	25	0.000152401	0.00804676	2.96702	16	0.0167015	5	0.012616	3.49085	13	45	0.0087073
MSigDB Pathway	Thrombin signaling and protease-activated receptors	29	0.000239205	0.0108879	2.97	15	0.0156576	13	0.013858	3.59246	11	37	0.00736772
MSigDB Pathway	Genes related to chemotaxis	35	0.000290654	0.0109618	3.05243	14	0.0146138	23	0.0502852	2.9538	11	45	0.00736772
MSigDB Pathway	ErbB signaling pathway	45	0.00060579	0.0177698	2.21204	22	0.0229645	24	0.0494251	2.30813	17	89	0.0113865
MSigDB Pathway	Signaling events mediated by focal adhesion kinase	47	0.000695885	0.019544	2.41532	18	0.0187891	8	0.0109608	3.07213	15	59	0.0100469
